1 **Disrupted trans-placental thyroid hormone transport in a human**  
2 **model for MCT8 deficiency**

3 Zhongli Chen<sup>1</sup>, Selmar Leeuwenburgh<sup>1</sup>, Wouter F. Zijderveld<sup>2</sup>, Michelle  
4 Broekhuizen<sup>3,4,5</sup>, Lunbo Tan<sup>3</sup>, Rugina I. Neuman<sup>3,6</sup>, Rutchanna M.S. Jongejan<sup>2</sup>,  
5 Yolanda B. de Rijke<sup>2</sup>, Irwin K.M. Reiss<sup>4</sup>, A.H. Jan Danser<sup>3</sup>, Robin P. Peeters<sup>1</sup>, Marcel  
6 E. Meima<sup>1</sup>, W. Edward Visser<sup>1</sup>

7 <sup>1</sup>Department of Internal Medicine, Academic Center for Thyroid Diseases

8 <sup>2</sup>Department of Clinical Chemistry

9 <sup>3</sup>Department of Internal Medicine; Division of Pharmacology and Vascular Medicine

10 <sup>4</sup>Department of Pediatrics; Division of Neonatology

11 <sup>5</sup>Department of Cardiology; Division of Experimental Cardiology

12 <sup>6</sup>Department of Obstetrics and Gynecology, Division of Obstetrics and

13 Prenatal Medicine, all Erasmus MC, 3015 GD, Rotterdam, The Netherlands

14 **Running title: T4 transport in MCT8 deficient placentas**

15 **Corresponding author**

16 W. Edward Visser

17 Erasmus Medical Center, Department of Internal Medicine, Academic Centre for

18 Thyroid Diseases

19 Dr. Molewaterplein 50, 3015GD, Rotterdam, the Netherlands

20 Phone: +3161884324

E-mail: [w.e.visser@erasmusmc.nl](mailto:w.e.visser@erasmusmc.nl)

21

22

23

24 **Abstract**

25 Maternal-to-fetal transfer of the thyroid hormone T4 is essential for prenatal  
26 neurodevelopment, but the transporter facilitating trans-placental T4 transport is  
27 unknown. Mutations in the thyroid hormone transporter MCT8 cause a  
28 neurodevelopmental and metabolic disorder which key clinical features can be  
29 ameliorated by the T3 analogue TRIAC. The placenta has defective MCT8 if the fetus  
30 has MCT8 deficiency as the placenta is a fetal tissue. Should placental MCT8 be  
31 physiologically relevant, defective T4 transport across the placenta could represent a  
32 hitherto unrecognized mechanism underlying MCT8 deficiency. We investigated the  
33 importance of MCT8 and the trans-placental transport of TRIAC using an ex vivo  
34 human placental perfusion setup.

35 Our study (i) showed that MCT8 has a major role in maternal-to-fetal T4 transport,  
36 (ii) implies that disrupted placental transport of thyroid hormones could be the culprit  
37 in the early cascade of events in MCT8 deficiency and (iii) indicated that the T3  
38 analogue TRIAC is efficiently transported across the placenta, independent of MCT8,  
39 holding potential in mothers carrying fetuses with MCT8 deficiency.

40 **Keywords: MCT8 deficiency, placenta, silychristin, thyroid hormone transport,**

41 **TRIAC**

42

43

44

45

46

47

48

49

50

51

52

53

54

## 55 **Introduction**

56 Thyroid hormones, the collective name for the prohormone T4 and the active  
57 hormone T3, are crucial for neurodevelopment. During prenatal neurodevelopment,  
58 maternal-to-fetal T4 transfer is critical, particularly during the first half of pregnancy  
59 with the fetal thyroid gland being immature (Patel *et al*, 2011). Therefore, maternal  
60 thyroid dysfunction negatively impacts brain structure and function in the offspring  
61 (Jansen *et al*, 2019; Korevaar *et al*, 2016; Li *et al*, 2010; Pop *et al*, 1999).

62 Intracellular bioavailability and transcellular transport of thyroid hormones are  
63 governed by plasma membrane transporters (Groeneweg *et al*, 2020). A key  
64 transporter is monocarboxylate transporter 8 (MCT8), which is expressed at the  
65 blood-brain barrier and in neural cells, and is crucial for transport of T3 and T4  
66 (Friesema *et al*, 2003; Groeneweg *et al.*, 2020). MCT8 deficiency, caused by  
67 mutations in MCT8, is a rare disorder consisting of severe intellectual and motor  
68 disability and abnormal thyroid function tests (Friesema *et al*, 2004). According to the  
69 current paradigm, the neurocognitive phenotype arises from impaired thyroid  
70 hormone entry into the brain (Lopez-Espindola *et al*, 2014; Vatine *et al*, 2017). With  
71 the blood-brain barrier being mature around 18 weeks, the placental barrier may be  
72 equally relevant for regulation of thyroid hormone bioavailability for the fetal brain.  
73 However, the transporter facilitating trans-placental thyroid hormone transport is  
74 unknown. Previous studies indicated MCT8 expression in the placenta (Chan *et al*,  
75 2006). The placenta has defective MCT8 if the fetus has MCT8 deficiency as the  
76 placenta is a fetal tissue (Suryawanshi *et al*, 2018). Should placental MCT8 be  
77 physiologically relevant, defective thyroid hormone transport across the placenta (a  
78 fetal-derived barrier) could represent a hitherto unrecognized mechanism underlying  
79 MCT8 deficiency.

80 Direct postnatal administration of the T3 analogue TRIAC, which can bypass  
81 defective MCT8, normalized the brain phenotype in *Mct8/Oatp1c1*-knockout mice,  
82 the model resembling MCT8 deficiency (Kersseboom *et al*, 2014). Recently, we  
83 showed that TRIAC can ameliorate key clinical features of this disease (Groeneweg *et al*  
84 *al*, 2019b). Therefore, it is paramount to assess its transport across the placenta for  
85 prenatal treatment in mothers carrying an MCT8 deficient fetus.

86 MCT8 is absent in commonly used human placental cell lines, largely limiting their  
87 role to study placental T4 transport (Chen *et al*, 2022b; Groeneweg *et al*, 2019a; Pan  
88 *et al*, 2021). Hence, we investigated the importance of MCT8 and the trans-placental  
89 transport of TRIAC in an *ex vivo* human placental model.

## 90 **Results**

91 First, using western blot we confirmed expression of MCT8 in term placentas (**Figure**  
92 **EV1**). Previous studies reported that 10  $\mu$ M silychristin completely inhibits  
93 MCT8-mediated T3 transport (Chen *et al.*, 2022b; Johannes *et al*, 2016). Here, we

94 determined that 10  $\mu$ M silychristin also fully blocked MCT8-mediated T4 transport  
95 (**Figure EV2**).

96 Next, we investigated the role of MCT8 in trans-placental maternal-to-fetal transfer of  
97 T4 by adding 10  $\mu$ M silychristin to the maternal reservoir in the presence of 100 nM  
98 T4 (**Figure 1A**). Pharmacological inhibition of MCT8 resulted in a ~60% reduction of  
99 maternal-to-fetal T4 transfer after 3h-perfusion (4.2 $\pm$ 1.2 nM fetal T4 in  
100 MCT8-inhibited placentas *versus* 10.6 $\pm$ 0.6 nM fetal T4 in control placentas) (**Figure**  
101 **1B**). As the deiodinase type 3 (D3) which converts intracellular T4 into the inactive  
102 metabolite reverse T3 (rT3) is highly active in human placenta (Koopdonk-Kool *et al*,  
103 1996; Stulp *et al*, 1998), we also measured rT3 concentrations in the perfusates.  
104 Pharmacological inhibition of MCT8 resulted in a ~42% reduction of rT3  
105 concentration in the maternal circulation and a ~80% reduction in the fetal circulation  
106 (**Figure EV3**). These findings indicate that MCT8 is responsible for a substantial  
107 amount of placental maternal-to-fetal T4 transfer.

108 Finally, we utilized the pharmacological inhibition of MCT8 to mimic MCT8  
109 deficiency in human placentas and tested trans-placental TRIAC transport (**Figure**  
110 **1A**). TRIAC concentrations decreased from 42.7 $\pm$ 6.2 nM to 19.4 $\pm$ 6.6 nM in the  
111 maternal circulation and readily appeared in the fetal circulation (an increase from 0  
112 nM to 17.1 $\pm$ 2.5 nM in the fetal circulation after 3h-perfusion) (**Figure 1C**). These  
113 results show that TRIAC is efficiently transferred from the mother to the fetus in  
114 MCT8-deficient placentas.

## 115 **Discussion**

116 Using an ex vivo human placental perfusion system, we showed that MCT8 has a  
117 major role in maternal-to-fetal transport of T4, potentially relevant for early fetal  
118 brain development. Therefore, impaired trans-placental T4 transport may be a new  
119 element in disturbing early brain development, even before maturation of the fetal  
120 BBB, in MCT8 deficiency. Indeed, bypassing the placental barrier with intra-amniotic  
121 LT4 administration in a pregnant woman carrying a fetus with MCT8 deficiency  
122 improved myelination and neurocognitive features compared to his untreated affected  
123 brother (Refetoff *et al*, 2021). Another implication of our findings is that compounds  
124 impairing MCT8 function during pregnancy (e.g. endocrine disrupting chemicals),  
125 may negatively impact on neurodevelopment in the offspring.

126 Following beneficial effects of TRIAC on metabolic outcomes, effects of early  
127 TRIAC intervention on brain outcomes in children with MCT8 deficiency are  
128 currently investigated (NCT02396459). The present study showing efficient  
129 maternal-to-fetal TRIAC transport provides preclinical support for future clinical  
130 studies of prenatal TRIAC treatment.

131 We acknowledge several limitations. First, we used human term placentas, while  
132 maternal-to-fetal T4 transport may be more relevant in early pregnancy. However,

133 MCT8 is consistently expressed in placenta throughout pregnancy (Chan *et al.*, 2006),  
134 favoring a role of MCT8 at all stages of pregnancy. Second, the inability to use  
135 binding proteins (e.g. bovine serum albumin (BSA)) at the maternal side, intrinsic to  
136 our model (Chen *et al.*, 2022a), resulted in super-physiological free fractions of T4 and  
137 TRIAC in the maternal circulation.

138 Our study (i) showed that MCT8 has a major role in maternal-to-fetal T4 transport  
139 implying that compounds (e.g. endocrine disrupting chemicals) inhibiting MCT8  
140 could also affect fetal T4 availability, (ii) implied that disrupted placental transport of  
141 thyroid hormones could be the culprit in the early cascade of events in MCT8  
142 deficiency and (iii) indicated that the T3 analogue TRIAC is efficiently transported  
143 across the placenta, independent of MCT8, holding potential in mothers carrying  
144 fetuses with MCT8 deficiency.

## 145 **Materials and methods**

### 146 **Reagents**

147 T4, TRIAC, silychristin and bovine serum albumin (BSA) were purchased from  
148 Sigma-Aldrich (Zwijndrecht, the Netherlands). T4 and TRIAC were dissolved in 0.1N  
149 NaOH and silychristin in dimethyl sulfoxide (DMSO).

### 150 **Patients and placentas**

151 The study received exemption for approval from the local institutional Medical Ethics  
152 Committee according to the Dutch Medical Research with Human Subjects Law  
153 (MEC-2017-418). All patients gave written consent before donating their placentas.  
154 Randomly selected placentas of uncomplicated singleton pregnancies were collected  
155 immediately after delivery (via cesarean section) at Erasmus University Medical  
156 Center, Rotterdam, the Netherlands. Retained placentas and placentas with maternal  
157 viral infections (HIV, hepatitis B, Zika) or fetal congenital abnormalities on  
158 ultrasound or maternal diabetes were excluded (Chen *et al.*, 2022a; Hitzerd *et al.*,  
159 2019).

### 160 **Placental perfusion experiments**

161 The perfusion model was set up as described before (Chen *et al.*, 2022a; Hitzerd *et al.*,  
162 2019). Perfusion buffer consisted of Krebs-Henseleit buffer (118 mM NaCl, 4.7  
163 mM KCl, 2.5 mM CaCl<sub>2</sub>, 1.2 mM MgSO<sub>4</sub>, 1.2 mM KH<sub>2</sub>PO<sub>4</sub>, 25 mM NaHCO<sub>3</sub> and 8.3  
164 mM glucose), supplemented with 5000 IU (0.5 ml/l) heparin LEO and aerated with  
165 95% O<sub>2</sub>/5% CO<sub>2</sub>). Briefly, cotyledons from human term placentas were cannulated  
166 within 30 min after delivery of the placentas. The fetal and maternal circulations were  
167 established and kept running for ~45 min as open circulations to wash out the blood  
168 of the placentas. The fetal flow rate was incrementally increased from 1 ml/min to 6  
169 ml/min and maintained throughout the 3 hours' experimental perfusion period. The

170 maternal flow was kept at 12 ml/min. Both maternal and fetal circulations were closed  
171 prior to switching to 200 ml fresh perfusion buffer containing the substances  
172 described below. Antipyrine (Sigma) (final concentration 110 mg/ml) was used as a  
173 positive marker for the sufficient overlap between the maternal and fetal circulations  
174 as it is able to diffuse across the placental barrier. Fluorescein isothiocyanate–dextran  
175 (FITC-dextran) (Sigma, molecular weight 40 kDa) (final concentration 39.5 mg/ml)  
176 was used as a marker of integrity of the capillary bed (Chen *et al.*, 2022a; Hume *et al.*,  
177 2004). Antipyrine was added to the maternal reservoir and FITC-dextran to the fetal  
178 reservoir.

179 To study T4 or TRIAC transfer from the maternal to fetal circulation, 200 µl of 100  
180 µM T4 or TRIAC (final concentration 100 nM) and 200 µl of 10 mM silychristin  
181 (final concentration 10 µM) were added to 200 ml perfusion buffer in the maternal  
182 reservoir (**Figure 1A**). 6.8 g BSA (final concentration 34 g/l) was added to the fetal  
183 reservoir (200 ml). Antifoaming A concentrate was applied to the top edge of the  
184 cylinders to prevent excessive foaming. Placentas were perfused for 3 hours and 1 ml  
185 (T4 transfer experiments) or 2 ml (TRIAC transfer experiments) samples were  
186 collected from the reservoirs into blood collection tubes (BD vacutainer) at the time  
187 points indicated in the figures. The samples were centrifuged at 3000 rpm for 10 min  
188 and the supernatants were collected as perfusates and stored at -20 °C.

189 The concentrations of antipyrine and FITC-dextran in the perfusates were measured  
190 as described previously (Chen *et al.*, 2022a; Hitzerd *et al.*, 2019). The perfusion  
191 experiments were excluded from further analysis when the foetal-to-maternal (F/M)  
192 ratio of antipyrine was <0.75 at  $t = 180$  min (indicating insufficient overlap between  
193 maternal and fetal circulation), or the maternal-to-foetal (M/F) ratio of FITC-dextran  
194 was >0.03 at  $t = 180$  min (indicating compromised intactness of the placental barrier)  
195 (Chen *et al.*, 2022a; Hume *et al.*, 2004).

196 The data of the control group of T4 perfusion experiments were from our previous  
197 study (Chen *et al.*, 2022a) which used the same procedure of placenta selection and  
198 perfusion protocol.

### 199 **Radioimmunoassays**

200 T4 and reverse T3 (rT3) concentrations in perfusates were measured using  
201 radioimmunoassays as described previously (Chen *et al.*, 2022a; Hume *et al.*, 2004).

### 202 **LC-MS/MS measurement**

203 TRIAC concentrations in perfusates were measured by liquid chromatography–mass  
204 spectrometry (LC-MS)/MS as described previously with some minor changes  
205 (Jongejan *et al.*, 2020). The maternal perfusates were diluted 10 times with perfusion  
206 buffer and the fetal perfusates were diluted twice prior to LC-MS/MS measurement to

207 avoid saturation. 500 µl of these diluted samples were used for measurement and the  
208 calibration curve was established in methanol.

### 209 **Statistics**

210 Data are presented as mean ± SD of 3 placentas. GraphPad Prism 8.4.0 (GraphPad, La  
211 Jolla, CA) was used for data analysis and unpaired two-tailed t-test was used to  
212 compare T4 or rT3 concentrations in the absence or presence of silychristin at t=180  
213 min. A p value <0.05 was considered significant.

214

### 215 **Acknowledgements**

216 We thank all participating women for donating their placentas. We thank Sam  
217 Schoenmakers and his team for facilitating placenta logistics and Barbara M. van der  
218 Linden, Lotte W. Voskamp, Linda AI-Hassany and Ilse R. de Goede for obtaining  
219 informed consent. We thank the department of pharmacy for measuring antipyrine.  
220 This research is funded by the EU Horizon 2020 programme, ATHENA project, grant  
221 number 825161, which is gratefully acknowledged. This publication reflects only the  
222 authors' view, and the European Commission is not responsible for any use that may  
223 be made of the information it contains.

### 224 **Author contributions**

225 ZC, WEV, MEM, RPP: study design. ZC, MB, LT, RIN: perfusion experiments. ZC,  
226 LS: radioimmuno-assays. WFZ: LC-MS/MS measurements. ZC, MEM, WEV: data  
227 analysis and interpretation, writing of manuscript. All: critically review and approval  
228 of the manuscript.

### 229 **Conflict of interest statement**

230 Erasmus Medical Center receives royalties from Egetis Therapeutics on the  
231 commercialization of TRIAC. None of the authors has personal benefit from any  
232 royalties.

233

### 234 **The Paper Explained**

#### 235 **Problem**

236 Thyroid hormones (prohormone T4 and bioactive hormone T3) are essential for  
237 neurodevelopment. During prenatal neurodevelopment, maternal-to-fetal transfer of  
238 T4 is critical, particularly during the first half of pregnancy when the fetal thyroid  
239 gland is immature. Transcellular transport is governed by plasma membrane  
240 transporters, but the transporter facilitating trans-placental thyroid hormone transport  
241 is unknown. With the blood-brain barrier being mature around 18 weeks, the placental  
242 barrier may be equally relevant for regulation of thyroid hormone bioavailability for  
243 the fetal brain. Mutations in the thyroid hormone transporter MCT8 cause a  
244 neurodevelopmental and metabolic disorder which key clinical features can be  
245 ameliorated by the T3 analogue TRIAC. Should placental MCT8 be physiologically  
246 relevant, defective T4 transport across the placenta (a fetal-derived barrier) could  
247 represent a hitherto unrecognized mechanism underlying MCT8 deficiency. The T3  
248 analogue TRIAC, which can bypass defective MCT8, can ameliorate key clinical  
249 features of this disease. Therefore, it is paramount to assess its transport across the  
250 placenta for prenatal treatment in mothers carrying a fetus with MCT8 deficiency.

## 251 **Results**

252 We investigated the importance of MCT8 and the trans-placental transport of T4 and  
253 TRIAC using an ex vivo human placental perfusion model, simulating normal and  
254 MCT8 deficient placentas. We showed that inhibition of MCT8 greatly reduced  
255 maternal-to-fetal T4 transfer. Moreover, TRIAC was efficiently transferred from the  
256 maternal to fetal circulation independent of MCT8.

257

## 258 **Impact**

259 First, we identified MCT8 as a major contributor to T4 transport across the human  
260 placenta. This observation not only fills a gap in physiology, but could have  
261 substantial implications (e.g. if MCT8 is affected through endocrine disrupting  
262 chemicals). Second, we discovered a hitherto unrecognized mechanism underlying  
263 MCT8 deficiency, emphasizing the relevance of prenatal treatment. Third, efficient  
264 maternal-to-fetal TRIAC transport provides preclinical support for future clinical  
265 studies of prenatal TRIAC treatment.

266

267

268

269

270

271

272

273



274

275

276

277

278

279 **References**

- 280 Chan SY, Franklyn JA, Pemberton HN, Bulmer JN, Visser TJ, McCabe CJ, Kilby MD  
281 (2006) Monocarboxylate transporter 8 expression in the human placenta: the  
282 effects of severe intrauterine growth restriction. *J Endocrinol* 189: 465–471
- 283 Chen Z, Peeters RP, Leeuwenburgh S, Broekhuizen M, Neuman RI, Hitzerd E, Tan  
284 L, Jongejan RMS, de Rijke YB, Reiss IKM *et al* (2022a) Asymmetrical transport  
285 of thyroxine across human term placenta. *Thyroid*
- 286 Chen Z, van der Sman ASE, Groeneweg S, de Rooij LJ, Visser WE, Peeters RP, Meima  
287 ME (2022b) Thyroid hormone transporters in a human placental cell model. *Thyroid*
- 288 Friesema EC, Ganguly S, Abdalla A, Manning Fox JE, Halestrap AP, Visser TJ (2003)  
289 Identification of monocarboxylate transporter 8 as a specific thyroid hormone  
290 transporter. *J Biol Chem* 278: 40128–40135
- 291 Friesema EC, Grueters A, Biebermann H, Krude H, von Moers A, Reeser M, Barrett  
292 TG, Mancilla EE, Svensson J, Kester MH *et al* (2004) Association between mutations  
293 in a thyroid hormone transporter and severe X-linked psychomotor retardation.  
294 *Lancet* 364: 1435–1437
- 295 Groeneweg S, Kersseboom S, van den Berge A, Dolcetta-Capuzzo A, van Geest FS,  
296 van Heerebeek REA, Arjona FJ, Meima ME, Peeters RP, Visser WE *et al* (2019a) In  
297 Vitro Characterization of Human, Mouse, and Zebrafish MCT8 Orthologues. *Thyroid*  
298 29: 1499–1510
- 299 Groeneweg S, Peeters RP, Moran C, Stoupa A, Auriol F, Tonduti D, Dica A, Paone  
300 L, Rozenkova K, Malikova J *et al* (2019b) Effectiveness and safety of the  
301 tri-iodothyronine analogue Triac in children and adults with MCT8 deficiency:  
302 an international, single-arm, open-label, phase 2 trial. *Lancet Diabetes*  
303 *Endocrinol* 7: 695–706
- 304 Groeneweg S, van Geest FS, Peeters RP, Heuer H, Visser WE (2020) Thyroid Hormone  
305 Transporters. *Endocr Rev* 41
- 306 Hitzerd E, Broekhuizen M, Mirabito Colafella KM, Glisic M, de Vries R, Koch BCP,  
307 de Raaf MA, Merkus D, Schoenmakers S, Reiss IKM *et al* (2019) Placental effects  
308 and transfer of sildenafil in healthy and preeclamptic conditions. *EBioMedicine*  
309 45: 447–455
- 310 Hume R, Simpson J, Delahunty C, van Toor H, Wu SY, Williams FL, Visser TJ, Scottish  
311 Preterm Thyroid G (2004) Human fetal and cord serum thyroid hormones:  
312 developmental trends and interrelationships. *J Clin Endocrinol Metab* 89:  
313 4097–4103

314 Jansen TA, Korevaar TIM, Mulder TA, White T, Muetzel RL, Peeters RP, Tiemeier  
315 H (2019) Maternal thyroid function during pregnancy and child brain morphology:  
316 a time window-specific analysis of a prospective cohort. *Lancet Diabetes*  
317 *Endocrinol* 7: 629-637

318 Johannes J, Jayarama-Naidu R, Meyer F, Wirth EK, Schweizer U, Schomburg L, Kohrle  
319 J, Renko K (2016) Silychristin, a Flavonolignan Derived From the Milk Thistle,  
320 Is a Potent Inhibitor of the Thyroid Hormone Transporter MCT8. *Endocrinology*  
321 157: 1694-1701

322 Jongejan RMS, Klein T, Meima ME, Visser WE, van Heerebeek REA, Luider TM, Peeters  
323 RP, de Rijke YB (2020) A Mass Spectrometry-Based Panel of Nine Thyroid Hormone  
324 Metabolites in Human Serum. *Clin Chem* 66: 556-566

325 Kersseboom S, Horn S, Visser WE, Chen J, Friesema EC, Vaurs-Barriere C, Peeters  
326 RP, Heuer H, Visser TJ (2014) In vitro and mouse studies supporting therapeutic  
327 utility of triiodothyroacetic acid in MCT8 deficiency. *Mol Endocrinol* 28:  
328 1961-1970

329 Koopdonk-Kool JM, de Vijlder JJ, Veenboer GJ, Ris-Stalpers C, Kok JH, Vulmsa  
330 T, Boer K, Visser TJ (1996) Type II and type III deiodinase activity in human  
331 placenta as a function of gestational age. *J Clin Endocrinol Metab* 81: 2154-2158

332 Korevaar TI, Muetzel R, Medici M, Chaker L, Jaddoe VW, de Rijke YB, Steegers  
333 EA, Visser TJ, White T, Tiemeier H *et al* (2016) Association of maternal thyroid  
334 function during early pregnancy with offspring IQ and brain morphology in  
335 childhood: a population-based prospective cohort study. *Lancet Diabetes*  
336 *Endocrinol* 4: 35-43

337 Li Y, Shan Z, Teng W, Yu X, Li Y, Fan C, Teng X, Guo R, Wang H, Li J *et al* (2010)  
338 Abnormalities of maternal thyroid function during pregnancy affect  
339 neuropsychological development of their children at 25-30 months. *Clin*  
340 *Endocrinol (Oxf)* 72: 825-829

341 Lopez-Espindola D, Morales-Bastos C, Grijota-Martinez C, Liao XH, Lev D, Sugo  
342 E, Verge CF, Refetoff S, Bernal J, Guadano-Ferraz A (2014) Mutations of the  
343 thyroid hormone transporter MCT8 cause prenatal brain damage and persistent  
344 hypomyelination. *J Clin Endocrinol Metab* 99: E2799-2804

345 Pan Y, Yan L, Chen Q, Wei C, Dai Y, Tong X, Zhu H, Lu M, Zhang Y, Jin X *et al*  
346 (2021) Dysfunction of Shh signaling activates autophagy to inhibit trophoblast  
347 motility in recurrent miscarriage. *Exp Mol Med* 53: 52-66

348 Patel J, Landers K, Li H, Mortimer RH, Richard K (2011) Delivery of maternal  
349 thyroid hormones to the fetus. *Trends Endocrinol Metab* 22: 164-170

350 Pop VJ, Kuijpers JL, van Baar AL, Verkerk G, van Son MM, de Vijlder JJ, Vulmsa  
351 T, Wiersinga WM, Drexhage HA, Vader HL (1999) Low maternal free thyroxine  
352 concentrations during early pregnancy are associated with impaired psychomotor  
353 development in infancy. *Clin Endocrinol (Oxf)* 50: 149-155

354 Refetoff S, Pappa T, Williams MK, Matheus MG, Liao XH, Hansen K, Nicol L, Pierce  
355 M, Blasco PA, Wiebers Jensen M *et al* (2021) Prenatal Treatment of Thyroid Hormone  
356 Cell Membrane Transport Defect Caused by MCT8 Gene Mutation. *Thyroid* 31: 713-720

357 Stulp MR, de Vijlder JJ, Ris-Stalpers C (1998) Placental iodothyronine  
358 deiodinase III and II ratios, mRNA expression compared to enzyme activity. *Mol*  
359 *Cell Endocrinol* 142: 67-73  
360 Suryawanshi H, Morozov P, Straus A, Sahasrabudhe N, Max KEA, Garzia A, Kustagi  
361 M, Tuschl T, Williams Z (2018) A single-cell survey of the human first-trimester  
362 placenta and decidua. *Sci Adv* 4: eaau4788  
363 Vatine GD, Al-Ahmad A, Barriga BK, Svendsen S, Salim A, Garcia L, Garcia VJ,  
364 Ho R, Yucer N, Qian T *et al* (2017) Modeling Psychomotor Retardation using iPSCs  
365 from MCT8-Deficient Patients Indicates a Prominent Role for the Blood-Brain  
366 Barrier. *Cell Stem Cell* 20: 831-843 e835

367

368

369

370

371

372

373

374

375

376

377

378

379

380

381

382

383

384

385

386

387

388

389

390

391

392

393

394 **Figures and legends:**

395

396 **Expanded View Figures**

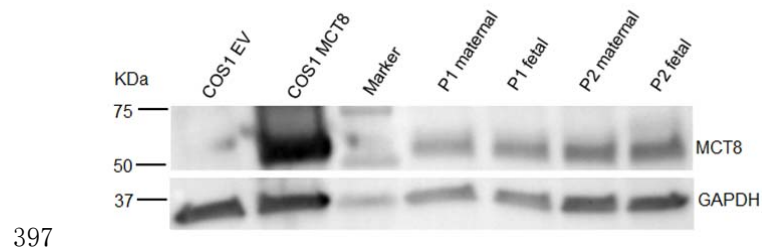

397

398 **Figure EV1.** MCT8 protein expression in human term placenta.

399 MCT8 was detected by western blot in the homogenates made from the biopsies that  
400 were collected from the maternal and fetal sides of 2 human term placentas (P1 and  
401 P2). Empty vector transfected COS1 cell lysate was used as a negative control and  
402 MCT8 transfected COS1 cell lysate as a positive control. Glyceraldehyde 3-phosphate  
403 dehydrogenase (GAPDH) was used as a loading control.

404

405

406

407

408

409

410

411

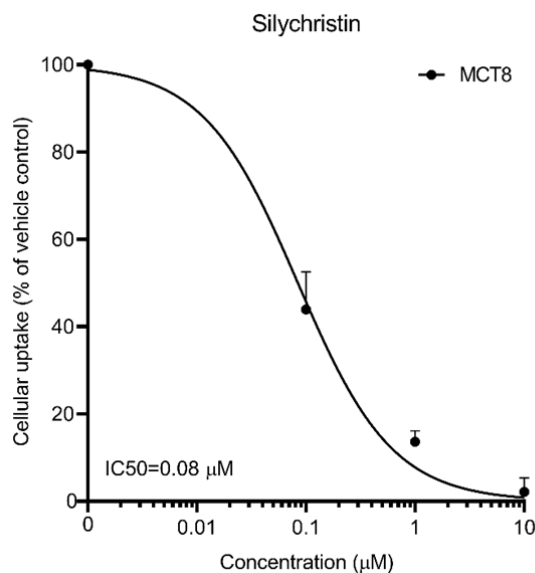

412

413 **Figure EV2.** The efficacy of silychristin for T4 uptake in MCT8 expressed COS1  
414 cells.

415 COS1 cells were transfected with MCT8 or empty vector (EV) together with the  
416 intracellular thyroid hormone binding protein  $\mu$ -crystallin (CRYM). Uptake assays  
417 were performed in DPBS/0.1%glucose with 1 nM  $^{125}$ I-T4 (50,000 counts per min) and  
418 incubated for 30 min. Uptake levels were corrected for background uptake in EV  
419 transfected control cells, incubated under the same condition and presented as a  
420 percentage. Resulting uptake levels were presented relatively to the uptake levels  
421 observed in presence of vehicle control. Data are presented as mean  $\pm$  SD of 3  
422 experiments. Non-linear regression (curve fitting) with the setting of “log (inhibitor)  
423 vs. normalized response” was used for the half-maximal inhibitory concentration  
424 (IC50) calculation (Chen *et al.*, 2022b).

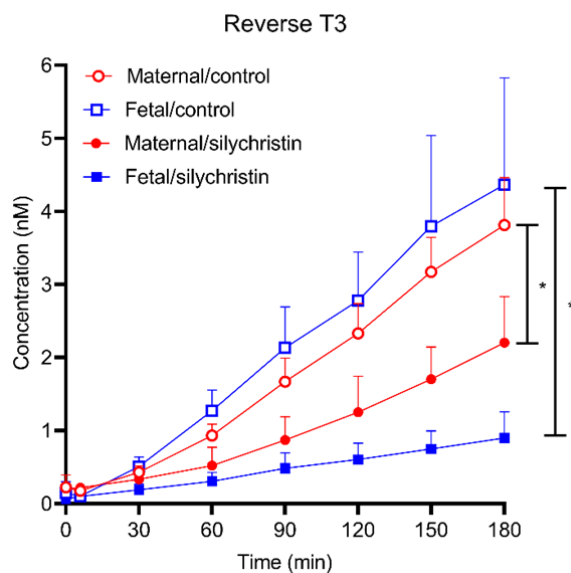

425

426 **Figure EV3.** Reverse T3 (rT3) concentrations in maternal-to-fetal T4 perfusions in  
427 the absence or presence of silychristin.

428 Samples were collected from the maternal and fetal circulations and rT3  
429 concentrations were measured by radioimmunoassay. Data are presented as mean  $\pm$   
430 SD of 3 placentas and unpaired two-tailed t-test was used for statistical analysis to  
431 compare rT3 concentrations at t=180 min. \*: p<0.05.

432

433

434

435

436

437

438

439

440

441

442

443

444 **Figure 1.** Maternal-to-fetal transfer of T4 or TRIAC in human placenta. (A)  
445 Schematic illustration of the *ex vivo* placental perfusion models. 100 nM T4 or  
446 TRIAC and 10  $\mu$ M silychristin were added into the maternal reservoir and 34g/l BSA  
447 into the fetal reservoir. T4 (B) and TRIAC (C) concentrations from 3 perfusions for  
448 each condition. ns: not significant; \*\*:  $p < 0.01$ .

449

450

451

452

453

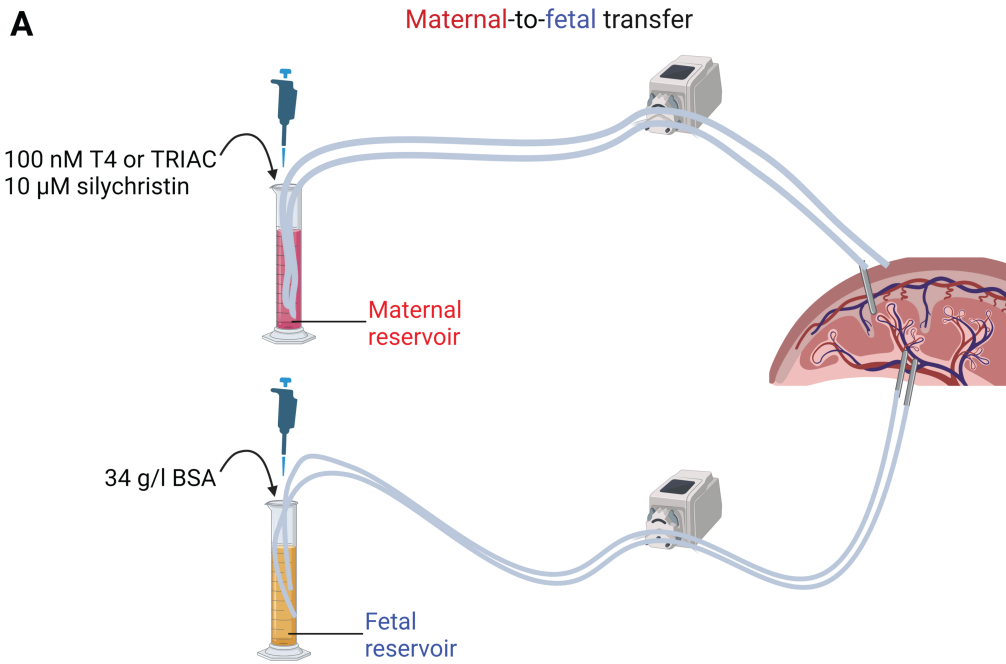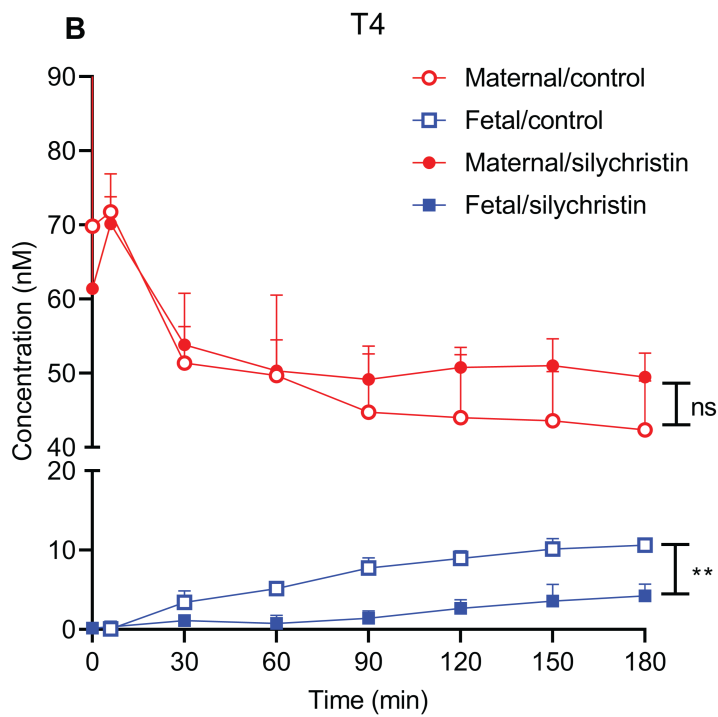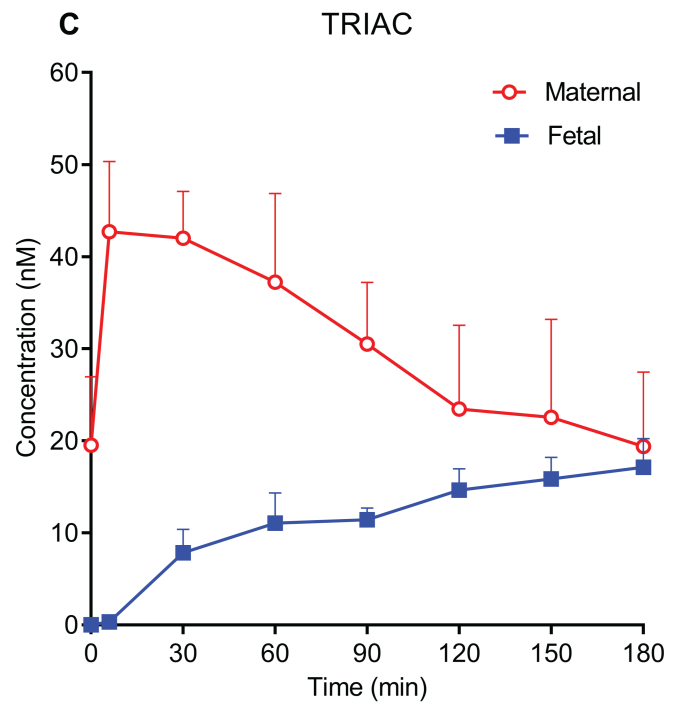

Source: https://www.biorxiv.org/content/10.1101/2023.01.19.524727v1.full.pdf
